# Supplementary material for: Isolation and Characterization of Flavonoids from Fermented Dandelion (Taraxacum mongolicum Hand.-Mazz.), and Assessment of Its Antioxidant Actions In Vitro and In Vivo
Source: MDPI journal article supplement (doi:10.3390/fermentation8070306), 2022-06-28
Supplement: s1 [file s1]

**Table S1.** The relative content of major flavonoid glycosides

| Molecular weight<br>(Da) | Formula                                         | Compounds                                                 | Class II                 | Relative<br>content |
|--------------------------|-------------------------------------------------|-----------------------------------------------------------|--------------------------|---------------------|
| 449.1                    | C <sub>21</sub> H <sub>20</sub> O <sub>11</sub> | Luteolin 7-O-glucoside (Cynaroside)                       | Flavonoid                | 23,420,000          |
| 593.16                   | C <sub>27</sub> H <sub>30</sub> O <sub>15</sub> | Kaempferol 3-O-rutinoside (Nicotiflorin)                  | Flavonols                | 21,362,000          |
| 449.11                   | C <sub>21</sub> H <sub>20</sub> O <sub>11</sub> | Quercetin-3-O- $\alpha$ -L-rhamnopyranoside               | Flavonols                | 20,955,000          |
| 595.16                   | C <sub>27</sub> H <sub>30</sub> O <sub>15</sub> | Kaempferol-3-O-neohesperidoside                           | Flavonols                | 17,111,000          |
| 595.16                   | C <sub>27</sub> H <sub>30</sub> O <sub>15</sub> | Luteolin-7-O-rutinoside                                   | Flavonoid                | 16,898,000          |
| 593.16                   | C <sub>27</sub> H <sub>30</sub> O <sub>15</sub> | Kaempferol 3-O-robinobioside (Biorobin)                   | Flavonols                | 16,529,000          |
| 595.16                   | C <sub>27</sub> H <sub>30</sub> O <sub>15</sub> | Kaempferol-3-O-glucoside-7-O-rhamnoside                   | Flavonols                | 13,746,000          |
| 595.17                   | C <sub>27</sub> H <sub>30</sub> O <sub>15</sub> | Tetrahydroxyflavone-C-rhamnosyl-glucoside                 | Flavonoid<br>carbonoside | 12,264,000          |
| 595.16                   | C <sub>27</sub> H <sub>30</sub> O <sub>15</sub> | Lonicerin                                                 | Flavonoid                | 12,034,000          |
| 435.08                   | C <sub>20</sub> H <sub>18</sub> O <sub>11</sub> | Avicularin                                                | Flavonols                | 11,444,000          |
| 447.1                    | C <sub>21</sub> H <sub>20</sub> O <sub>11</sub> | Astragalin (Kaempferol 3-O-Glucoside)                     | Flavonols                | 10,000,000          |
| 449.11                   | C <sub>21</sub> H <sub>20</sub> O <sub>11</sub> | Kaempferol 3-O- $\beta$ -D-glucopyranoside                | Flavonols                | 9,056,100           |
| 597.15                   | C <sub>26</sub> H <sub>28</sub> O <sub>16</sub> | Quercetin-O-Hexoside-O-Pentoside                          | Flavonols                | 8,656,200           |
| 447.09                   | C <sub>21</sub> H <sub>20</sub> O <sub>11</sub> | Kaempferol 7-O-glucoside                                  | Flavonols                | 5,930,100           |
| 463.12                   | C <sub>22</sub> H <sub>22</sub> O <sub>11</sub> | Diosmetin-7-O-galactoside                                 | Flavonoid                | 4,211,900           |
| 611.16                   | C <sub>27</sub> H <sub>30</sub> O <sub>16</sub> | Kaempferol-3,7-di-O- $\beta$ -D-glucopyranoside           | Flavonols                | 4,203,900           |
| 627.2                    | C <sub>27</sub> H <sub>30</sub> O <sub>17</sub> | 6-Hydroxykaempferol-7,6-O-Diglucoside                     | Flavonols                | 4,076,700           |
| 611.15                   | C <sub>27</sub> H <sub>30</sub> O <sub>16</sub> | Luteolin-7-O- $\beta$ -D-gentiobioside                    | Flavonoid                | 3,829,600           |
| 465.1                    | C <sub>21</sub> H <sub>20</sub> O <sub>12</sub> | Isohyperoside                                             | Flavonols                | 3,620,300           |
| 461.07                   | C <sub>21</sub> H <sub>18</sub> O <sub>12</sub> | Kaempferol-3-O- $\beta$ -D-glucuronide                    | Flavonols                | 3,139,100           |
| 593.18                   | C <sub>28</sub> H <sub>32</sub> O <sub>14</sub> | Acacetin-7-O-rutinoside                                   | Flavonoid                | 2,877,800           |
| 479.11                   | C <sub>22</sub> H <sub>22</sub> O <sub>12</sub> | Isorhamnetin-3-O- $\beta$ -D-glucoside                    | Flavonols                | 2,872,500           |
| 461.08                   | C <sub>21</sub> H <sub>18</sub> O <sub>12</sub> | Tetrahydroxy-flavone-7-O- $\beta$ -D-glucuronide          | Flavonoid                | 2,824,300           |
| 435.13                   | C <sub>21</sub> H <sub>24</sub> O <sub>10</sub> | Phloretin 2'-O-glucoside                                  | Isoflavones              | 2,358,300           |
| 609.18                   | C <sub>28</sub> H <sub>32</sub> O <sub>15</sub> | Diosmin                                                   | Flavonoid                | 2,224,900           |
| 533.1                    | C <sub>24</sub> H <sub>22</sub> O <sub>14</sub> | Kaempferol 3-O-(6"-O-malonyl)-galactoside                 | Flavonols                | 2,183,300           |
| 533.1                    | C <sub>24</sub> H <sub>22</sub> O <sub>14</sub> | Kaempferol 3-O-(6"-O-malonyl)-glucoside                   | Flavonols                | 2,047,800           |
| 611.1                    | C <sub>27</sub> H <sub>30</sub> O <sub>16</sub> | 8-C-Hexosyl-luteolin O-hexoside                           | Flavonoid<br>carbonoside | 1,985,100           |
| 593.18                   | C <sub>28</sub> H <sub>32</sub> O <sub>14</sub> | Chrysoeriol-C-rhamnoside-O-rhamnoside                     | Flavonoid                | 1,786,200           |
| 433.08                   | C <sub>20</sub> H <sub>18</sub> O <sub>11</sub> | Quercetin-3-O- $\alpha$ -L-arabinopyranoside(guaijaverin) | Flavonols                | 1,563,400           |
| 627.1                    | C <sub>28</sub> H <sub>34</sub> O <sub>16</sub> | 8-C-Hexosyl-hesperetin O-hexoside                         | Flavonoid<br>carbonoside | 1,548,500           |
| 463.09                   | C <sub>21</sub> H <sub>18</sub> O <sub>12</sub> | Luteolin 7-O-glucuronide                                  | Flavonoid                | 1,439,600           |
| 463.09                   | C <sub>21</sub> H <sub>20</sub> O <sub>12</sub> | Quercetin-7-O-Glucoside                                   | Flavonols                | 1,239,200           |
| 463.08                   | C <sub>21</sub> H <sub>18</sub> O <sub>12</sub> | Scutellarin                                               | Flavonoid                | 1,209,900           |
| 609.18                   | C <sub>28</sub> H <sub>32</sub> O <sub>15</sub> | Neodiosmin (Diosmetin-7-O-Neohesperidoside)               | Flavonoid                | 1,183,800           |
| 463                      | C <sub>21</sub> H <sub>20</sub> O <sub>12</sub> | Quercetin 3-O-glucoside (Isotrifoliin)                    | Flavonols                | 1,163,500           |

|        |                                                 |                                                                        |                       |           |
|--------|-------------------------------------------------|------------------------------------------------------------------------|-----------------------|-----------|
| 463.13 | C <sub>22</sub> H <sub>24</sub> O <sub>11</sub> | Hesperetin 5- <i>O</i> -glucoside                                      | Dihydroflavonol       | 1,103,600 |
| 611.16 | C <sub>27</sub> H <sub>30</sub> O <sub>16</sub> | Quercetin glucoside-rhamnoside                                         | Flavonols             | 1,071,700 |
| 609.18 | C <sub>28</sub> H <sub>32</sub> O <sub>15</sub> | Diosmetin-7- <i>O</i> -rutin                                           | Flavonoid             | 1,060,600 |
| 611.16 | C <sub>30</sub> H <sub>26</sub> O <sub>14</sub> | Quercetin- <i>O</i> -feruloyl-Pentoside                                | Flavonols             | 1,006,200 |
| 579.16 | C <sub>27</sub> H <sub>30</sub> O <sub>14</sub> | Apigenin 7-rutinoside (Isorhoifolin)                                   | Flavonoid             | 975,380   |
| 581.15 | C <sub>26</sub> H <sub>28</sub> O <sub>15</sub> | Kaempferol- <i>O</i> -Pentoside- <i>O</i> -hexoside                    | Flavonols             | 971,630   |
| 477.1  | C <sub>22</sub> H <sub>20</sub> O <sub>12</sub> | Diosmetin-7- <i>O</i> -glucuronide                                     | Flavonoid             | 962,680   |
| 627.15 | C <sub>27</sub> H <sub>30</sub> O <sub>17</sub> | Quercetin 3,7-bis- <i>O</i> -β-D-glucoside                             | Flavonols             | 948,460   |
| 449.1  | C <sub>21</sub> H <sub>20</sub> O <sub>11</sub> | Luteolin-3'- <i>O</i> -β-D-glucoside                                   | Flavonoid             | 931,390   |
| 463    | C <sub>21</sub> H <sub>20</sub> O <sub>12</sub> | Spiraeoside                                                            | Flavonols             | 916,940   |
| 449.1  | C <sub>21</sub> H <sub>20</sub> O <sub>11</sub> | Luteolin-4'- <i>O</i> -β-D-glucoside                                   | Flavonoid             | 829,220   |
| 475.1  | C <sub>22</sub> H <sub>20</sub> O <sub>12</sub> | Chrysoeriol <i>O</i> -glucuronic acid                                  | Flavonoid             | 691,500   |
| 465.1  | C <sub>21</sub> H <sub>20</sub> O <sub>12</sub> | 6-Hydroxykaempferol-7- <i>O</i> -glucoside                             | Flavonols             | 669,250   |
| 463.1  | C <sub>21</sub> H <sub>20</sub> O <sub>12</sub> | Hyperin                                                                | Flavonols             | 508,030   |
| 609.1  | C <sub>27</sub> H <sub>30</sub> O <sub>16</sub> | Bioquercetin                                                           | Flavonols             | 475,080   |
| 451    | C <sub>21</sub> H <sub>22</sub> O <sub>11</sub> | Eriodictyol 7- <i>O</i> -glucoside                                     | Dihydroflavone        | 409,500   |
| 533.1  | C <sub>24</sub> H <sub>22</sub> O <sub>14</sub> | Isorhamnetin 3- <i>O</i> -β-(2"- <i>O</i> -acetyl-β-D-glucuronide)     | Flavonols             | 407,450   |
| 609.1  | C <sub>27</sub> H <sub>30</sub> O <sub>16</sub> | Rutin                                                                  | Flavonols             | 320,810   |
| 773.21 | C <sub>33</sub> H <sub>40</sub> O <sub>21</sub> | Quercetin glucoside-glucoside-rhamnoside                               | Flavonols             | 317,890   |
| 417.1  | C <sub>20</sub> H <sub>18</sub> O <sub>10</sub> | Juglanin                                                               | Flavonols             | 317,680   |
| 493.1  | C <sub>23</sub> H <sub>24</sub> O <sub>12</sub> | Tricin 7- <i>O</i> -hexoside                                           | Flavonoid             | 308,670   |
| 607.1  | C <sub>28</sub> H <sub>32</sub> O <sub>15</sub> | Chrysoeriol 7- <i>O</i> -rutinoside                                    | Flavonoid             | 250,040   |
| 551.1  | C <sub>24</sub> H <sub>22</sub> O <sub>15</sub> | Quercetin-7- <i>O</i> -(6'- <i>O</i> -malonyl)-β-D-glucoside           | Flavonols             | 237,290   |
| 611.16 | C <sub>27</sub> H <sub>30</sub> O <sub>16</sub> | Luteolin-7,3'-Di- <i>O</i> -β-D-Glucoside                              | Flavonoid             | 213,650   |
| 759.2  | C <sub>32</sub> H <sub>38</sub> O <sub>21</sub> | Quercetin- <i>O</i> -Pentoside- <i>O</i> -Hexoside- <i>O</i> -Hexoside | Flavonols             | 174,330   |
| 625.18 | C <sub>28</sub> H <sub>32</sub> O <sub>16</sub> | Isochrysoeriol C-hexosyl- <i>O</i> -hexoside                           | Flavonoid             | 161,910   |
| 475.12 | C <sub>23</sub> H <sub>22</sub> O <sub>11</sub> | Apigenin-7- <i>O</i> -(6'- <i>O</i> -acetyl)-β-D-glucoside             | Flavonoid             | 152,890   |
| 415.1  | C <sub>22</sub> H <sub>24</sub> O <sub>8</sub>  | Apigenin-3- <i>O</i> -α-L-rhamnoside                                   | Flavonoid             | 149,300   |
| 449.1  | C <sub>21</sub> H <sub>20</sub> O <sub>11</sub> | Quercitrin                                                             | Flavonols             | 135,080   |
| 565.2  | C <sub>26</sub> H <sub>28</sub> O <sub>14</sub> | Isoschaftoside                                                         | Flavonoid carbonoside | 117,330   |
| 609.19 | C <sub>28</sub> H <sub>34</sub> O <sub>15</sub> | Hesperidin                                                             | Dihydroflavone        | 116,250   |
| 505.1  | C <sub>23</sub> H <sub>22</sub> O <sub>13</sub> | Quercetin 3- <i>O</i> -(6"- <i>O</i> -acetyl)-galactoside              | Flavonols             | 115,330   |
| 789.2  | C <sub>33</sub> H <sub>40</sub> O <sub>22</sub> | 6-Hydroxykaempferol-3,7,6- <i>O</i> -triglycoside                      | Flavonols             | 112,900   |

**Table S2.** The relative content of major flavonoid aglycones

| Molecular weight (Da) | Formula                                        | Compounds  | Class II  | Relative content |
|-----------------------|------------------------------------------------|------------|-----------|------------------|
| 286.04                | C <sub>15</sub> H <sub>10</sub> O <sub>6</sub> | Luteolin   | Flavonoid | 4,983,700        |
| 300.05                | C <sub>16</sub> H <sub>12</sub> O <sub>6</sub> | Hispidulin | Flavonoid | 3,514,700        |

|        |                                                 |                              |                          |           |
|--------|-------------------------------------------------|------------------------------|--------------------------|-----------|
| 300.05 | C <sub>16</sub> H <sub>12</sub> O <sub>6</sub>  | Diosmetin                    | Flavonoid                | 3,472,700 |
| 304.05 | C <sub>15</sub> H <sub>12</sub> O <sub>7</sub>  | Taxifolin                    | Dihydroflavonol          | 3,057,300 |
| 330.07 | C <sub>17</sub> H <sub>14</sub> O <sub>7</sub>  | Tricin                       | Flavonoid                | 1,137,200 |
| 286.05 | C <sub>15</sub> H <sub>10</sub> O <sub>6</sub>  | Isoscutellarein              | Flavonoid                | 1,030,300 |
| 330.07 | C <sub>17</sub> H <sub>14</sub> O <sub>7</sub>  | Jaceosidin                   | Flavonoid                | 522,290   |
| 372.11 | C <sub>20</sub> H <sub>20</sub> O <sub>7</sub>  | Tangeretin                   | Flavonols                | 500,730   |
| 274.07 | C <sub>15</sub> H <sub>14</sub> O <sub>5</sub>  | Phloretin                    | Chalcones                | 498,600   |
| 448.08 | C <sub>21</sub> H <sub>20</sub> O <sub>11</sub> | Isorientin                   | Flavonoid<br>carbonoside | 436,490   |
| 320.04 | C <sub>15</sub> H <sub>12</sub> O <sub>8</sub>  | Dihydromyricetin(Ampelopsin) | Dihydroflavonol          | 386,080   |
| 272.06 | C <sub>15</sub> H <sub>12</sub> O <sub>5</sub>  | Naringenin                   | Dihydroflavone           | 270,750   |
| 402.11 | C <sub>21</sub> H <sub>22</sub> O <sub>8</sub>  | Nobiletin                    | Flavonoid                | 252,030   |
| 272.06 | C <sub>15</sub> H <sub>12</sub> O <sub>5</sub>  | Pinobanksin                  | Dihydroflavonol          | 220,840   |
| 316.05 | C <sub>16</sub> H <sub>12</sub> O <sub>7</sub>  | Isorhamnetin                 | Flavonols                | 146,200   |
| 316.06 | C <sub>16</sub> H <sub>12</sub> O <sub>7</sub>  | Tamarixetin                  | Flavonols                | 121,410   |

---
